# Supplementary material for: Temperature-stable Li4Ti3O8 composite microwave dielectric ceramics and their applications in dielectric resonator antennas
Source: Royal Society of Chemistry journal article supplement (doi:10.1039/d4tc00930d), 2024-01-01
Supplement: d4tc00930d1.pdf [file d4tc00930d1.pdf]

**Temperature-stable  $\text{Li}_4\text{Ti}_3\text{O}_8$  composite microwave  
dielectric ceramic and its applications in dielectric resonator  
antennas**

Linzhao Ma<sup>1</sup>, Chao Zhang<sup>1</sup>, Zitong Zhao, Guo Tian, Gaosheng Li\*, Hao Li\*

College of Electrical and Information Engineering, Hunan University, Changsha  
410082, China.

AUTHOR INFORMATION

\*Corresponding Authors

E-mail address: hli@hnu.edu.cn (Hao Li).

E-mail address: gaosheng7070@vip.163.com.

<sup>1</sup> These authors contributed equally to this work and should be considered co-first authors.

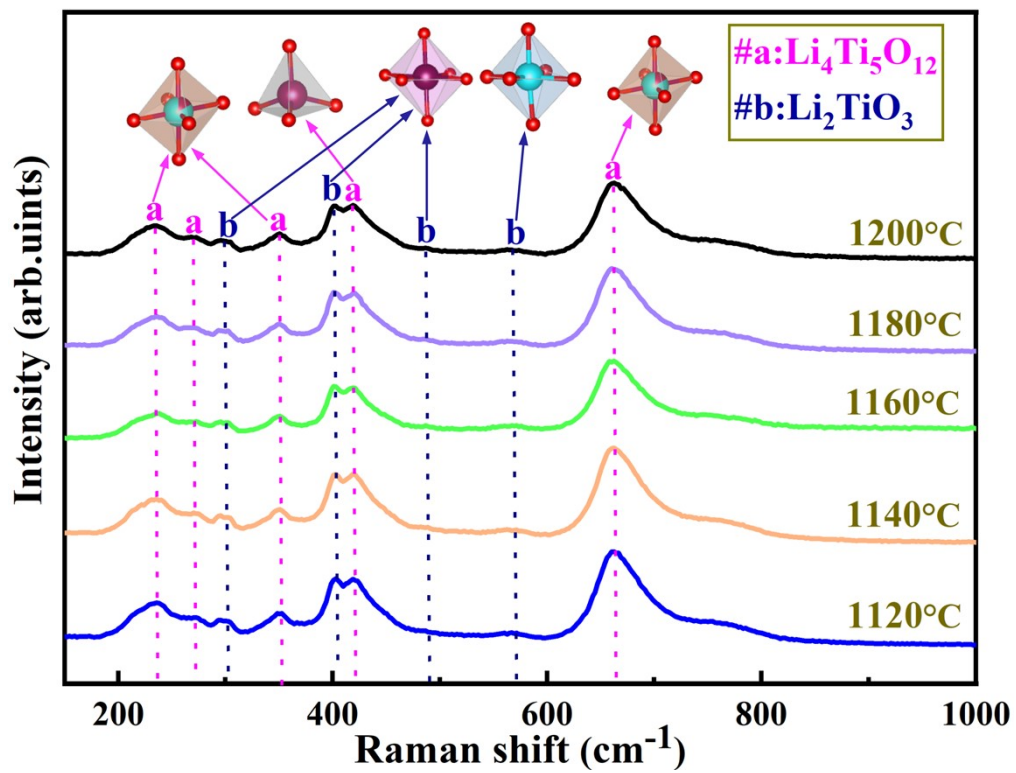

Fig. S1 Shows raman spectra in the range of 1120 – 1200 °C.

**Table S1** The Rietveld refinement parameters of  $\text{Li}_4\text{Ti}_3\text{O}_8$  ceramics.

| formula                               | S.T. (°C) | Lattice parameter |        |        |                        | $R_{wp}$ | $R_p$  | $\chi^2$ |
|---------------------------------------|-----------|-------------------|--------|--------|------------------------|----------|--------|----------|
|                                       |           | a(Å)              | b(Å)   | c(Å)   | $V_{cell}(\text{Å}^3)$ |          |        |          |
| $\text{Li}_4\text{Ti}_5\text{O}_{12}$ | 1120      | 8.3554            | 8.3554 | 8.3554 | 583.329                | 11.36    | 8.7    | 1.67     |
| $\text{Li}_2\text{TiO}_3$             |           | 5.0628            | 8.7743 | 9.7679 | 427.031                |          |        |          |
| $\text{Li}_4\text{Ti}_5\text{O}_{12}$ | 1140      | 8.3551            | 8.3551 | 8.3551 | 583.253                | 10.84    | 8.25   | 1.56     |
| $\text{Li}_2\text{TiO}_3$             |           | 5.0635            | 8.7836 | 9.7521 | 426.902                |          |        |          |
| $\text{Li}_4\text{Ti}_5\text{O}_{12}$ | 1160      | 8.3554            | 8.3554 | 8.3554 | 583.312                | 7.82     | 5.81   | 1.053    |
| $\text{Li}_2\text{TiO}_3$             |           | 5.0734            | 8.7978 | 9.7996 | 430.402                |          |        |          |
| $\text{Li}_4\text{Ti}_5\text{O}_{12}$ | 1180      | 8.3535            | 8.3535 | 8.3535 | 582.915                | 6.41     | 0.9467 | 0.95     |
| $\text{Li}_2\text{TiO}_3$             |           | 5.0644            | 8.7884 | 9.7968 | 429.119                |          |        |          |
| $\text{Li}_4\text{Ti}_5\text{O}_{12}$ | 1200      | 8.3535            | 8.3535 | 8.3535 | 582.909                | 6.52     | 0.9852 | 0.98     |
| $\text{Li}_2\text{TiO}_3$             |           | 5.0701            | 8.7945 | 9.7962 | 429.839                |          |        |          |

**Table S2** Testing parameters for Rietveld refinement XRD .

| parameters |           |
|------------|-----------|
| Start      | 5.0000°   |
| Stop       | 110.0000° |
| Step       | 0.0100°   |
| Speed      | 10.0°/min |

**Table S3** Microwave dielectric properties of ceramics at different sintering temperatures.

| S.T. (°C) | $\epsilon_r$ | $Q \times f$ (GHz) | $\tau_f$ (ppm/°C) |
|-----------|--------------|--------------------|-------------------|
| 1120      | 26.11        | 44811              | -8.3              |
| 1140      | 26.43        | 59326              | -6.4              |
| 1160      | 26.72        | 66020              | -3.3              |
| 1180      | 26.55        | 56492              | -6.7              |
| 1200      | 26.49        | 53706              | -7.2              |

**Table S4** Sintering shrinkage of the developed samples.

| S.T. (°C) | Original diameter size (mm) | Sintering diameter size (mm) | Shrinkage (100%) |
|-----------|-----------------------------|------------------------------|------------------|
| 1120      | 12                          | 10.33                        | 13.9167          |
| 1140      | 12                          | 10.36                        | 13.6667          |
| 1160      | 12                          | 10.30                        | 14.1667          |
| 1180      | 12                          | 10.29                        | 14.25            |
| 1200      | 12                          | 10.27                        | 14.4167          |

## 1. Calculate the relative density of composite ceramics

The theoretical density of  $\text{Li}_4\text{Ti}_3\text{O}_8$  ceramic material can be calculated using equation 6:<sup>S8</sup>

$$\rho_{th} = \frac{W_1 + W_2}{W_1 / \rho_1 + W_2 / \rho_2} \quad (\text{S1})$$

where  $W$  represents weight fractions and  $\rho_{th}$  signifies theoretical density.  $\rho_1$  and  $\rho_2$  denote the theoretical densities of  $\text{Li}_4\text{Ti}_5\text{O}_{12}$  and  $\text{Li}_2\text{TiO}_3$ , respectively. The mass fraction of the two phases is provided in Table S5. The theoretical density of the ceramic is calculated using equation S1.

**Table S5** The density of ceramics at different sintering temperatures.

| S.T. (°C) | $W_1$ (%) | $W_2$ (%) | $\rho_{1\text{theory}}$<br>(g/cm <sup>3</sup> ) | $\rho_{2\text{theory}}$<br>(g/cm <sup>3</sup> ) | $\rho_{\text{bulk}}$ (g/cm <sup>3</sup> ) | $\rho_{\text{theory}}$<br>(%) | $\rho_{\text{relative}}$<br>(%) |
|-----------|-----------|-----------|-------------------------------------------------|-------------------------------------------------|-------------------------------------------|-------------------------------|---------------------------------|
| 1120      | 58.996    | 41.004    | 3.486                                           | 3.415                                           | 3.212                                     | 3.4565                        | 92.92                           |
| 1140      | 58.201    | 41.799    | 3.487                                           | 3.416                                           | 3.277                                     | 3.4569                        | 94.79                           |
| 1160      | 58.442    | 41.558    | 3.486                                           | 3.388                                           | 3.29                                      | 3.4445                        | 95.51                           |
| 1180      | 58.309    | 41.691    | 3.489                                           | 3.398                                           | 3.253                                     | 3.4505                        | 94.27                           |
| 1200      | 57.095    | 42.905    | 3.489                                           | 3.393                                           | 3.241                                     | 3.447                         | 94.02                           |

$W_1$  (%): The mass fraction of  $\text{Li}_4\text{Ti}_5\text{O}_{12}$ .  $W_2$  (%): The mass fraction of  $\text{Li}_2\text{TiO}_3$ .

$\rho_{1\text{theory}}$ : Theoretical density of  $\text{Li}_4\text{Ti}_5\text{O}_{12}$ .  $\rho_{2\text{theory}}$ : Theoretical density of  $\text{Li}_2\text{TiO}_3$ .

$\rho_{\text{bulk}}$ : Volume density of  $\text{Li}_4\text{Ti}_3\text{O}_8$  (Measured by Archimedes drainage method).

$\rho_{\text{theory}}$ : Calculate the theoretical density of  $\text{Li}_4\text{Ti}_3\text{O}_8$  according to equation S1.

$\rho_{\text{relative}}$ : Relative density of  $\text{Li}_4\text{Ti}_3\text{O}_8$  ( $\rho_{\text{bulk}}/\rho_{\text{theory}}$ ).

## 2. Predicting the dielectric constant of composite ceramics

The molar fractions of  $\text{Li}_4\text{Ti}_5\text{O}_{12}$  and  $\text{Li}_2\text{TiO}_3$  can be calculated according to the following equation:

$$m_x = \frac{W_x / M_{rx}}{\sum W_x / M_{rx}} \quad (\text{S2})$$

The phases  $\text{Li}_4\text{Ti}_5\text{O}_{12}$  and  $\text{Li}_2\text{TiO}_3$  are denoted as x. The mole fraction, mass fraction, and relative molecular mass are denoted as  $m_x$ ,  $W_x$  and  $M_{rx}$ , respectively. The molar fractions of the ceramics are shown in Table S6.

**Table S6** The density of ceramics at different sintering temperatures.

| S.T. (°C) | W <sub>1</sub> (%) | W <sub>2</sub> (%) | M <sub>r1</sub> | M <sub>r2</sub> | m <sub>1</sub> | m <sub>2</sub> |
|-----------|--------------------|--------------------|-----------------|-----------------|----------------|----------------|
| 1120      | 58.996             | 41.004             | 459.0918        | 109.7472        | 0.2559         | 0.7441         |
| 1140      | 58.201             | 41.799             | 459.0918        | 109.7472        | 0.2497         | 0.7503         |
| 1160      | 58.442             | 41.558             | 459.0918        | 109.7472        | 0.2516         | 0.7484         |
| 1180      | 58.309             | 41.691             | 459.0918        | 109.7472        | 0.2506         | 0.7494         |
| 1200      | 57.095             | 42.905             | 459.0918        | 109.7472        | 0.2413         | 0.7587         |

W<sub>1</sub> (%): The mass fraction of  $\text{Li}_4\text{Ti}_5\text{O}_{12}$ . W<sub>2</sub> (%): The mass fraction of  $\text{Li}_2\text{TiO}_3$ .

M<sub>r1</sub>: Relative molecular mass of  $\text{Li}_4\text{Ti}_5\text{O}_{12}$ . M<sub>r2</sub>: Relative molecular mass of  $\text{Li}_2\text{TiO}_3$ .

m<sub>1</sub>: The mole fraction of  $\text{Li}_4\text{Ti}_5\text{O}_{12}$ . m<sub>2</sub>: The mole fraction of  $\text{Li}_2\text{TiO}_3$ .

The volume fraction of ceramics can be calculated using equation S3.<sup>S9</sup>

$$V_x = \frac{m_x M_{rx} / \rho_x}{\sum m_x M_{rx} / \rho_x} \quad (\text{S3})$$

The mole fraction, relative molecular mass, density, and volume fraction are represented by  $m_x$ ,  $M_{rx}$ ,  $\rho_x$  and  $V_x$ , respectively. The volume fractions of ceramics are shown in Table S7.

**Table S7** The density of ceramics at different sintering temperatures.

| S.T. (°C) | m <sub>1</sub> | m <sub>2</sub> | M <sub>r1</sub> | M <sub>r2</sub> | $\rho_{1\text{theory}}$<br>(g/cm <sup>3</sup> ) | $\rho_{2\text{theory}}$<br>(g/cm <sup>3</sup> ) | V <sub>1</sub> | V <sub>2</sub> |
|-----------|----------------|----------------|-----------------|-----------------|-------------------------------------------------|-------------------------------------------------|----------------|----------------|
| 1120      | 0.2559         | 0.7441         | 459.0918        | 109.7472        | 3.486                                           | 3.415                                           | 0.585          | 0.415          |
| 1140      | 0.2497         | 0.7503         | 459.0918        | 109.7472        | 3.487                                           | 3.416                                           | 0.577          | 0.423          |
| 1160      | 0.2516         | 0.7484         | 459.0918        | 109.7472        | 3.486                                           | 3.388                                           | 0.577          | 0.423          |
| 1180      | 0.2506         | 0.7494         | 459.0918        | 109.7472        | 3.489                                           | 3.398                                           | 0.577          | 0.423          |
| 1200      | 0.2413         | 0.7587         | 459.0918        | 109.7472        | 3.489                                           | 3.393                                           | 0.564          | 0.436          |

m<sub>1</sub>: The mole fraction of  $\text{Li}_4\text{Ti}_5\text{O}_{12}$ . m<sub>2</sub>: The mole fraction of  $\text{Li}_2\text{TiO}_3$ .

$M_{r1}$ : Relative molecular mass of  $\text{Li}_4\text{Ti}_5\text{O}_{12}$ .  $M_{r2}$ : Relative molecular mass of  $\text{Li}_2\text{TiO}_3$ .

$V_1$ : Volume fraction of  $\text{Li}_4\text{Ti}_5\text{O}_{12}$ .  $V_2$ : Volume fraction of  $\text{Li}_2\text{TiO}_3$ .

$\rho_{1\text{theory}}$ : Theoretical density of  $\text{Li}_4\text{Ti}_5\text{O}_{12}$ .  $\rho_{2\text{theory}}$ : Theoretical density of  $\text{Li}_2\text{TiO}_3$ .

XRD analysis shows that  $\text{Li}_4\text{Ti}_5\text{O}_{12}$  and  $\text{Li}_2\text{TiO}_3$  can coexist with each other. The  $\epsilon_r$  of multiphase composite ceramics can be approximated using mixing rules. The  $\epsilon_r$  of  $\text{Li}_4\text{Ti}_3\text{O}_8$  ceramics is predicted according to the following three equation:<sup>S10</sup>

$$\text{parallel mixing law: } \epsilon = V_1\epsilon_1 + V_2\epsilon_2 \quad (\text{S4})$$

$$\text{series mixing law: } 1/\epsilon = V_1/\epsilon_1 + V_2/\epsilon_2 \quad (\text{S5})$$

$$\text{logarithmic mixing law: } \ln \epsilon_{\log} = V_1 \ln \epsilon_1 + V_2 \ln \epsilon_2 \quad (\text{S6})$$

The volume fraction and relative permittivity of  $\text{Li}_4\text{Ti}_5\text{O}_{12}$  are represented by  $V_1$  and  $\epsilon_1$ , respectively.  $V_2$  and  $\epsilon_2$  denote the volume fraction and relative permittivity of  $\text{Li}_2\text{TiO}_3$ .

The volume fractions of  $\text{Li}_4\text{Ti}_5\text{O}_{12}$  and  $\text{Li}_2\text{TiO}_3$  are calculated as 0.5774 and 0.4426, respectively (ceramics were sintered at 1160 °C). The calculated values of  $\epsilon_r$  are 26.67, 26.04, and 26.36 using equations S4, S5, and S6, respectively.

**Table S8** The density of ceramics at different sintering temperatures.

| S.T. (°C) | $V_1$ | $V_2$ | $\epsilon_{r1}$ | $\epsilon_{r2}$ | Eq.S4. | Eq.S5 | Eq.S6 |
|-----------|-------|-------|-----------------|-----------------|--------|-------|-------|
| 1120      | 0.585 | 0.415 | 30.1            | 22              | 26.74  | 26.11 | 26.43 |
| 1140      | 0.577 | 0.423 | 30.1            | 22              | 26.67  | 26.04 | 26.36 |
| 1160      | 0.577 | 0.423 | 30.1            | 22              | 26.67  | 26.04 | 26.36 |
| 1180      | 0.577 | 0.423 | 30.1            | 22              | 26.67  | 26.04 | 26.36 |
| 1200      | 0.564 | 0.436 | 30.1            | 22              | 26.57  | 25.94 | 26.25 |

$V_1$ : Volume fraction of  $\text{Li}_4\text{Ti}_5\text{O}_{12}$ .  $V_2$ : Volume fraction of  $\text{Li}_2\text{TiO}_3$ .

$\epsilon_{r1}$ : Relative permittivity of  $\text{Li}_4\text{Ti}_5\text{O}_{12}$ .  $\epsilon_{r2}$ : Relative permittivity of  $\text{Li}_2\text{TiO}_3$ .

Eq.S4: The result is calculated according to equation S4.

Eq.S5: The result is calculated according to equation S5.

Eq.S6: The result is calculated according to equations S6.

### 3. Predicting the dielectric loss of composite ceramics

There are relatively fewer theoretical models available for predicting dielectric loss due to its complexity. The dielectric loss of composite ceramics can be predicted by equation S7.<sup>S11</sup>

$$(\tan \delta_c)^\alpha = \sum V_i (\tan \delta_i)^\alpha \quad (\text{S7})$$

where  $\tan \delta_c$  and  $\tan \delta_i$  represents the dielectric loss of composite materials and type  $i$  materials, respectively.  $V_i$  is the molar fraction of the  $i$ -th material.  $\tan \delta$  and  $Q$  have a reciprocal relationship ( $\tan \delta = 1/Q$ ), where  $Q$  is the quality factor. The  $\text{Li}_4\text{Ti}_3\text{O}_8$  composite ceramic is composed of two phases, and equation S7 can be written in the following form:

$$(1/Q)^\alpha = V_1(1/Q_1)^\alpha + V_2(1/Q_2)^\alpha \quad (\text{S8})$$

where  $Q$  is the quality factor of  $\text{Li}_4\text{Ti}_3\text{O}_8$  composite ceramics, and  $Q_1$  and  $Q_2$  are the quality factors of  $\text{Li}_4\text{Ti}_5\text{O}_{12}$  and  $\text{Li}_2\text{TiO}_3$ , respectively. The constant  $\alpha$  is related to the mixing state of the material, where  $\alpha = -1$  represents for serial mixing and  $\alpha = 1$  represents for parallel mixing. According to Table S9, it can be seen that the  $Q \times f$  value obtained from parallel mixing is the highest, and there is still a significant deviation from the measured  $Q \times f$  value. The research has shown that the dielectric loss of composite ceramics is related to external factors such as the defects, interface,

and preparation process of ceramics.

**Table S9** The density of ceramics at different sintering temperatures.

| S.T. (°C) | $V_1$ | $V_2$ | $Q_1$   | $Q_2$   | $f$ (GHz) | $Q \times f$ ( $a = -1$ )(GHz) | $Q \times f$ ( $a = 1$ )(GHz) |
|-----------|-------|-------|---------|---------|-----------|--------------------------------|-------------------------------|
| 1120      | 0.585 | 0.415 | 4218.57 | 7383.72 | 7.07      | 36279                          | 39112                         |
| 1140      | 0.577 | 0.423 | 4218.57 | 7383.72 | 7.01      | 36122                          | 38957                         |
| 1160      | 0.577 | 0.423 | 4218.57 | 7383.72 | 7.06      | 36379                          | 39235                         |
| 1180      | 0.577 | 0.423 | 4218.57 | 7383.72 | 7.03      | 36225                          | 39068                         |
| 1200      | 0.564 | 0.436 | 4218.57 | 7383.72 | 7.02      | 36421                          | 39301                         |

$V_1$ : Volume fraction of  $\text{Li}_4\text{Ti}_5\text{O}_{12}$ .  $V_2$ : Volume fraction of  $\text{Li}_2\text{TiO}_3$ .

$Q_1$ : Quality factor of  $\text{Li}_4\text{Ti}_5\text{O}_{12}$ .  $Q_2$ : Quality factor of  $\text{Li}_2\text{TiO}_3$ .

$f$ (GHz): Resonance frequency of  $\text{Li}_4\text{Ti}_3\text{O}_8$  composite ceramics.

#### 4. Predicting the $\tau_f$ of composite ceramics

According to the Lichtenecker logarithmic rule, the value of mixed  $\tau_f$  can be obtained using the following equation:<sup>S12</sup>

$$\tau_f = V_1\tau_{f1} + V_2\tau_{f2} \quad (\text{S9})$$

where  $\tau_{f1}$  and  $\tau_{f2}$  are the  $\tau_f$  values of  $\text{Li}_4\text{Ti}_5\text{O}_{12}$  and  $\text{Li}_2\text{TiO}_3$ , respectively. The measured  $\tau_f$ (-3.3 ppm/°C) and the calculated  $\tau_f$ (-0.08 ppm/°C) are close because the negative  $\tau_f$  of  $\text{Li}_4\text{Ti}_5\text{O}_{12}$  (-15 ppm/°C) can compensate for the positive  $\tau_f$  of  $\text{Li}_2\text{TiO}_3$  (+20.3 ppm/°C).

**Table S10** The density of ceramics at different sintering temperatures.

| S.T. (°C) | $V_1$ | $V_2$ | $\tau_{f1}$ | $\tau_{f2}$ | $\tau_f$ |
|-----------|-------|-------|-------------|-------------|----------|
| 1120      | 0.585 | 0.415 | -15         | +20.3       | -0.3505  |
| 1140      | 0.577 | 0.423 | -15         | +20.3       | -0.0681  |
| 1160      | 0.577 | 0.423 | -15         | +20.3       | -0.0681  |
| 1180      | 0.577 | 0.423 | -15         | +20.3       | -0.0681  |
| 1200      | 0.564 | 0.436 | -15         | +20.3       | 0.3908   |

$V_1$ : Volume fraction of  $\text{Li}_4\text{Ti}_5\text{O}_{12}$ .  $V_2$ : Volume fraction of  $\text{Li}_2\text{TiO}_3$ .



$\tau_{1f}$ :  $\tau_f$  of  $\text{Li}_4\text{Ti}_5\text{O}_{12}$ .  $\tau_{2f}$ :  $\tau_f$  of  $\text{Li}_2\text{TiO}_3$ .

$\tau_f$ :  $\tau_f$  of  $\text{Li}_4\text{Ti}_3\text{O}_8$ .

**Table S11** The phonon parameters of  $\text{Li}_4\text{Ti}_3\text{O}_8$  ceramics.

| Mode                        | $\omega_{oj}$ | $\omega_{pj}$            | $\gamma_j$ | $\Delta\varepsilon_j$                | $\Delta\varepsilon_j/\varepsilon_j(\%)$ | $\tan \delta_j \times 10^7$ |
|-----------------------------|---------------|--------------------------|------------|--------------------------------------|-----------------------------------------|-----------------------------|
| 1                           | 95.318        | 32.945                   | 4.888      | 0.1195                               | 0.568                                   | 4.8177                      |
| 2                           | 218.813       | 475.459                  | 30.181     | 4.7215                               | 22.453                                  | 223.098                     |
| 3                           | 241.159       | 425.828                  | 29.454     | 3.1178                               | 14.826                                  | 118.366                     |
| 4                           | 268.166       | 391.948                  | 30.028     | 2.1362                               | 10.158                                  | 66.866                      |
| 5                           | 297.879       | 285.438                  | 26.792     | 0.9182                               | 4.366                                   | 20.782                      |
| 6                           | 330.676       | 716.498                  | 34.178     | 4.6948                               | 22.327                                  | 110.001                     |
| 7                           | 369.927       | 339.844                  | 35.922     | 0.8439                               | 4.013                                   | 16.606                      |
| 8                           | 405.893       | 404.055                  | 61.655     | 0.9909                               | 4.712                                   | 27.7996                     |
| 9                           | 448.439       | 269.752                  | 26.528     | 0.3618                               | 1.72                                    | 3.5781                      |
| 10                          | 482.127       | 792.496                  | 169.095    | 2.7019                               | 12.848                                  | 147.336                     |
| 11                          | 575.179       | 155.489                  | 47.668     | 0.0730                               | 0.347                                   | 0.7893                      |
| 12                          | 632.083       | 373.761                  | 84.212     | 0.3496                               | 1.662                                   | 5.5245                      |
| $\varepsilon_\infty = 5.16$ |               | $\varepsilon(w) = 26.19$ |            | $\tan \delta = 7.455 \times 10^{-5}$ |                                         |                             |

## References

- S1 H. F. Zhou, J. Z. Gong, N. Wang and X. L. Chen, *Ceram. Int.*, 2016, **42**, 8822-8825.
- S2 W, Li, L. Fang, Y. Tang, Y. H. Sun and C. C. Li, *J. Alloys Compd.*, 2017, **701**, 295-300.
- S3 J. J. Bian and Y. F. Dong, *Mater. Sci. Eng. B*, 2011, **176**, 147-151.
- S4 J. Zhang, R. Z. Zuo, Y. Wang and S. S. Qi, *Mater. Lett.*, 2016, **164**, 353-355.
- S5 L. L. Yuan and J. J. Bian, *Ferroelectrics.*, 2009, **387**, 123-129.
- S6 D. Zhou, H. Wang, L. X. Pang, X. Yao and X. G. Wu, *J. Am. Ceram. Soc.*, 2008, **91**, 4115-4117.
- S7 Y. N. Wang, Y. C. Chen and R. Y. Syu, *J. Mater. Sci. Mater. Electron.*, 2015, **26**, 1494-1499.
- S8 L. Z. Ma, P. C. Zhang, S. C. Liu, Q. Z. Wen, Q. B. Du and H. Li, *Ceram. Int.*, 2023, **49**, 28615-28620.
- S9 S. Z. Hao, D. Zhou, C. Du, L. X. Pang, C. J. Sing, S. Trukhanov, A. Trukhanov, A. S. B. Sombra, J. Varghese, Q. Li and X. Q. Zhang, *ACS Appl. Electron. Mater.*, 2021, **3**, 2286-2296.
- S10 Y. P. Ji, K. X. Song, S. Y. Zhang, Z. L. Lu, G. Wang, L. H. Li, D. Zhou, D.W.

- Wang, I. M. Reaney, *J. Eur. Ceram. Soc.*, 2021, **41**, 424-429.
- S11 K. Wakino, T. Okada, N. Yoshida and K. Tomono, *J. Am. Ceram. Soc.*, 1993, **76**, 2588.
- S12 H. Zhou, D. W. Wang, H. O. Zhu, W. J. Bian, H. D. Gu, H. K. Zhu, L. X. Wang, Q. T. Zhang and S. W. Ta, *Ceram. Int.*, 2022, **48**, 6998-7004.
